# Supplementary material for: Fisetin Modulates Toll-like Receptor-Mediated Innate Antiviral Response in Chikungunya Virus-Infected Hepatocellular Carcinoma Huh7 Cells
Source: MDPI journal article supplement (doi:10.3390/immuno2040043), 2022-11-25
Supplement: s1 [file s1]

Archive with 1 entries (1 files):
- immuno-1965381-supplementary.pdf
