# Supplementary material for: Fisetin Modulates Toll-like Receptor-Mediated Innate Antiviral Response in Chikungunya Virus-Infected Hepatocellular Carcinoma Huh7 Cells
Source: MDPI journal article supplement (doi:10.3390/immuno2040043), 2022-11-25
Supplement: s1 [file s1 › immuno-1965381-supplementary.pdf]

## ***Supplementary Material***

**Supplemental Table S1: Forward and reverse primers used for qRT-PCR.**

| <b>Gene</b> | <b>Primers</b>                                                                                  |
|-------------|-------------------------------------------------------------------------------------------------|
| CHIKV-E1    | Forward: 5'-TCG ACG CGC CCT CTT TAA-3'<br>Reverse: 5'-ATC GAA TGC ACC GCA CAC T-3'              |
| GAPDH       | Forward: 5'-CCA GCA AGA GCA CAA GAG GAA-3'<br>Reverse: 5'-ATG GTA CAT GAC AAG GTG CGG-3'        |
| ISG-15      | Forward: 5'-GGC TGG GAC CTG ACG GTG AAG-3'<br>Reverse: 5'-GTC CGC CCG CCA GGC TCT GT-3'         |
| MX-2        | Forward: 5'-AAA CTG TTC AGA GCA CGA TTG AAG-3'<br>Reverse: 5'-ACC ATC TGC TCC ATT CTG AAC TG-3' |
| OAS-3       | Forward: 5'-CCG AAC TGT CCT GGG CCT GAT CC-3'<br>Reverse: 5'-CCC ATT CCC CAG GTC CCA TGT GG-3'  |
| PKR         | Forward: 5'-ACG CTT TGG GGC TAA TTC TT-3'<br>Reverse: 5'-TTC TCT GGG CTT TTC TTC CA-3'          |

# Supplementary Material

(A)

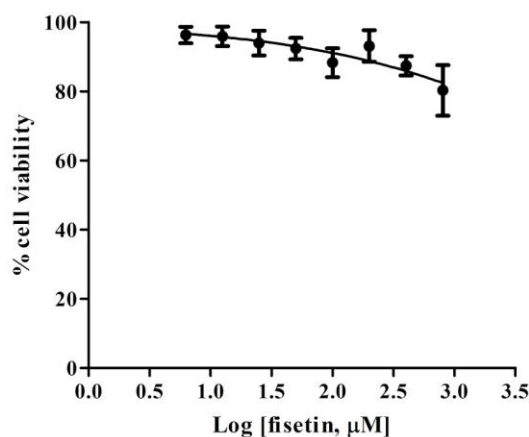

$\text{CC}_{50}$ : 49.2 mM  
MNTD: 1.22 mM

(B)

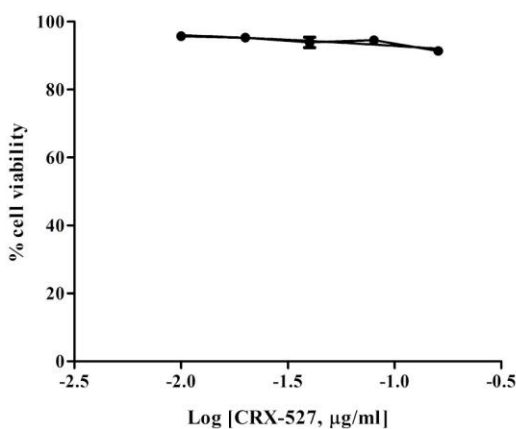

$\text{CC}_{50}$ : 1.82 mg/ml  
MNTD: 8.99  $\mu\text{g/ml}$

(C)

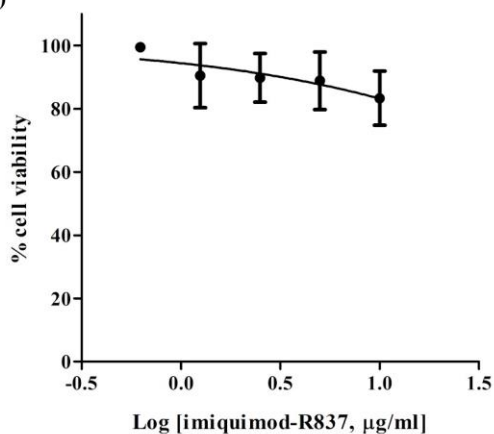

$\text{CC}_{50}$ : 226.7  $\mu\text{g/ml}$   
MNTD: 14.32  $\mu\text{g/ml}$

**Supplemental Figure S1: Cytotoxicity assay of (A) fisetin, (B) CRX-527 and (C) imiquimod-R837 at 48 hpi on Huh7 cells.** Data are representative of three independent experiments and values are expressed as mean  $\pm$  SD. The  $\text{CC}_{50}$  and MNTD were determined using non-linear regression curve analysis of GraphPad Prism 5.

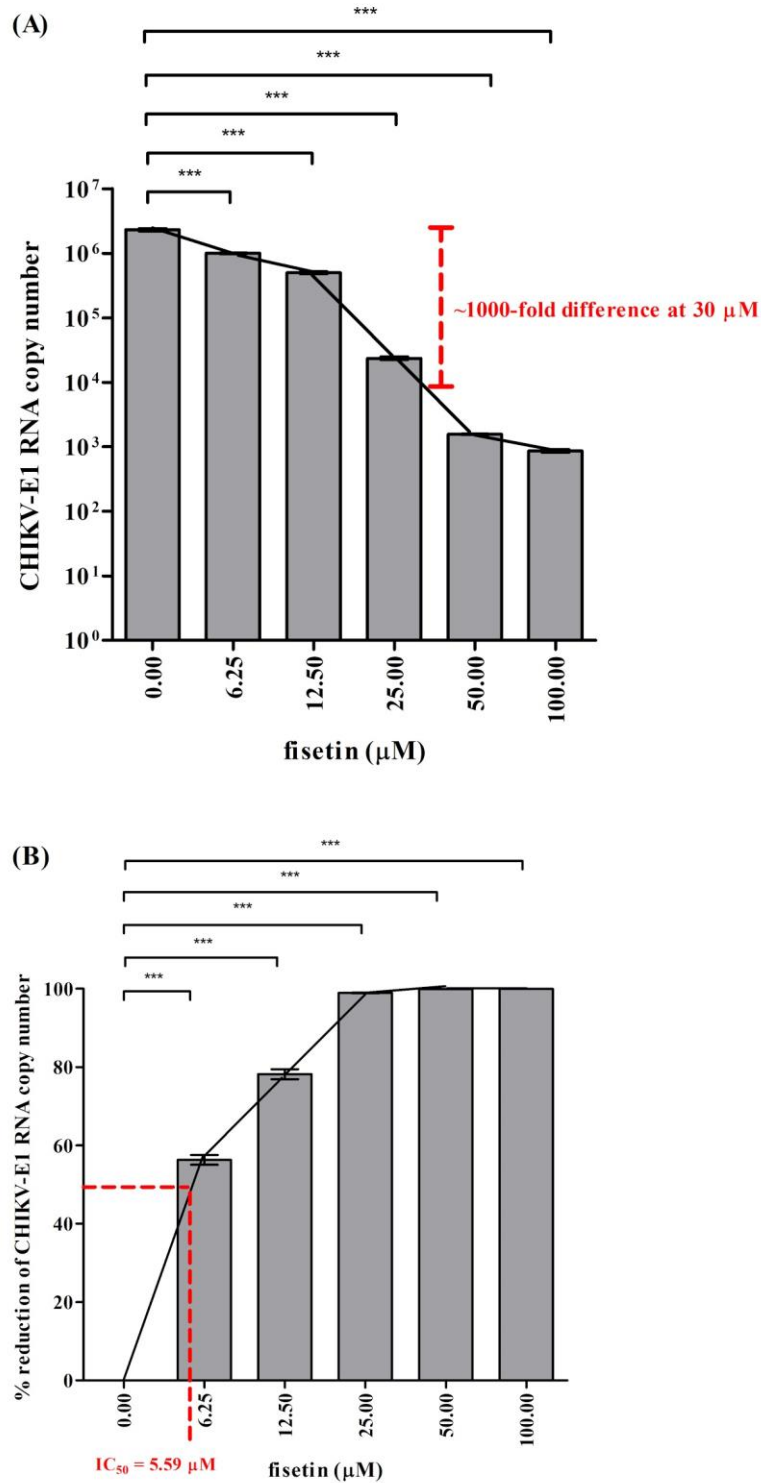

**Supplemental Figure S2: Viral yield assay represented as (A) CHIKV-E1 RNA copy number and (B) percentage reduction of CHIKV-E1 RNA copy number, at 48 hpi of treatment with fisetin.** Data are representative of three independent experiments and values are expressed as mean  $\pm$  SD. One-way ANOVA ( $p < 0.0001$ ) and Dunnett's multiple comparison post-test (\* is  $p < 0.05$ , \*\* is  $p < 0.01$  and \*\*\* is  $p < 0.001$ ) were performed by setting mock Huh7 cells as a control.

Supplementary Material

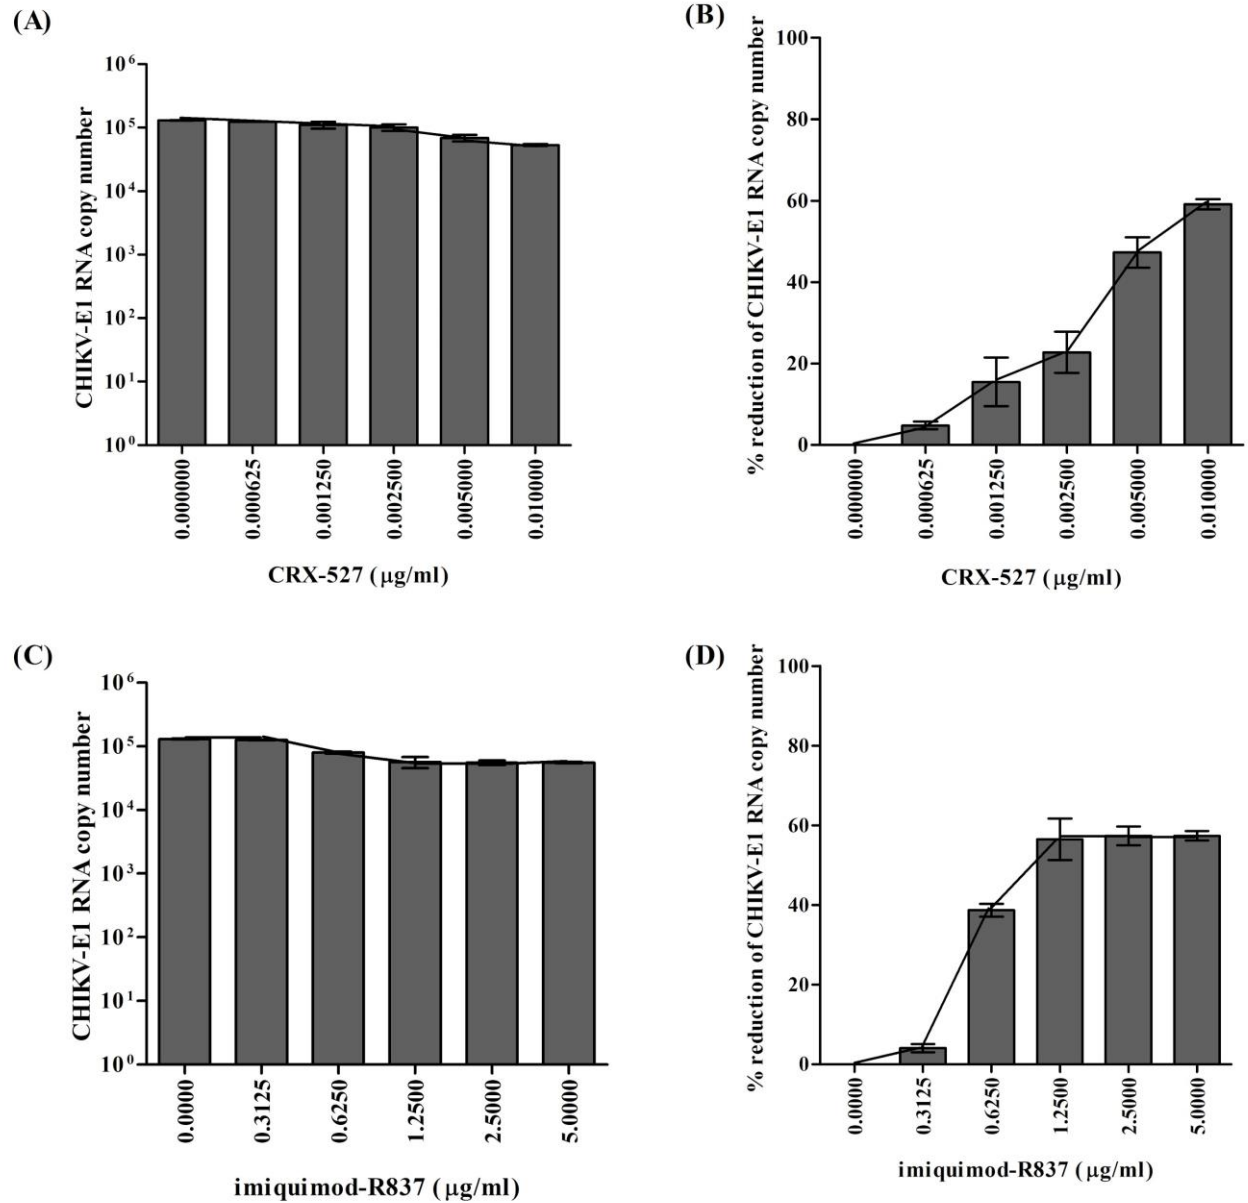

**Supplemental Figure S3: Viral yield assay represented as (A) and (C) CHIKV-E1 RNA copy number and (B) and (D) percentage reduction of CHIKV-E1 RNA copy number, at 48 hpi of treatment with CRX-527 and imiquimod-R837.** Data are representative of three independent experiments and values are expressed as mean  $\pm$  SD. One-way ANOVA ( $p < 0.0001$ ) and Dunnett's multiple comparison post-test (\* is  $p < 0.05$ , \*\* is  $p < 0.01$  and \*\*\* is  $p < 0.001$ ) were performed by setting mock Huh7 cells as a control.

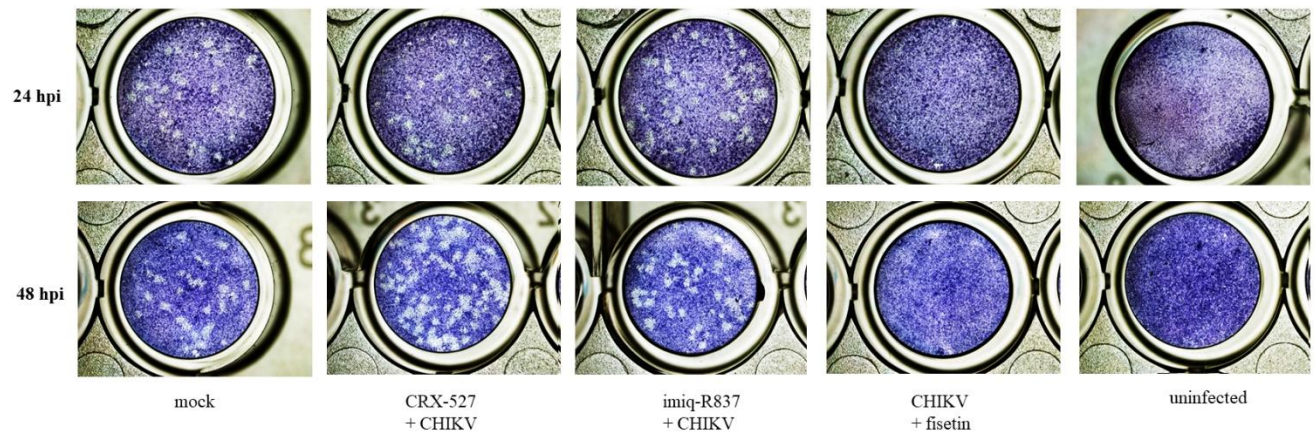

**Supplemental Figure S4: CHIKV inhibitory potential of fisetin and the TLR agonists.** Plaque count (pfu/ml) obtained from mock, agonist-treated, and fisetin-treated Huh7 cells (dilution 1:10). Data are representative of three independent experiments, and values are expressed as mean  $\pm$  SD. One-way ANOVA ( $p < 0.0001$ ) and Dunnett's multiple comparison post-test (\* is  $p < 0.05$ , \*\* is  $p < 0.01$  and \*\*\* is  $p < 0.001$ ) were performed by setting mock Huh7 cells of respective time points as independent control.

## Supplementary Material

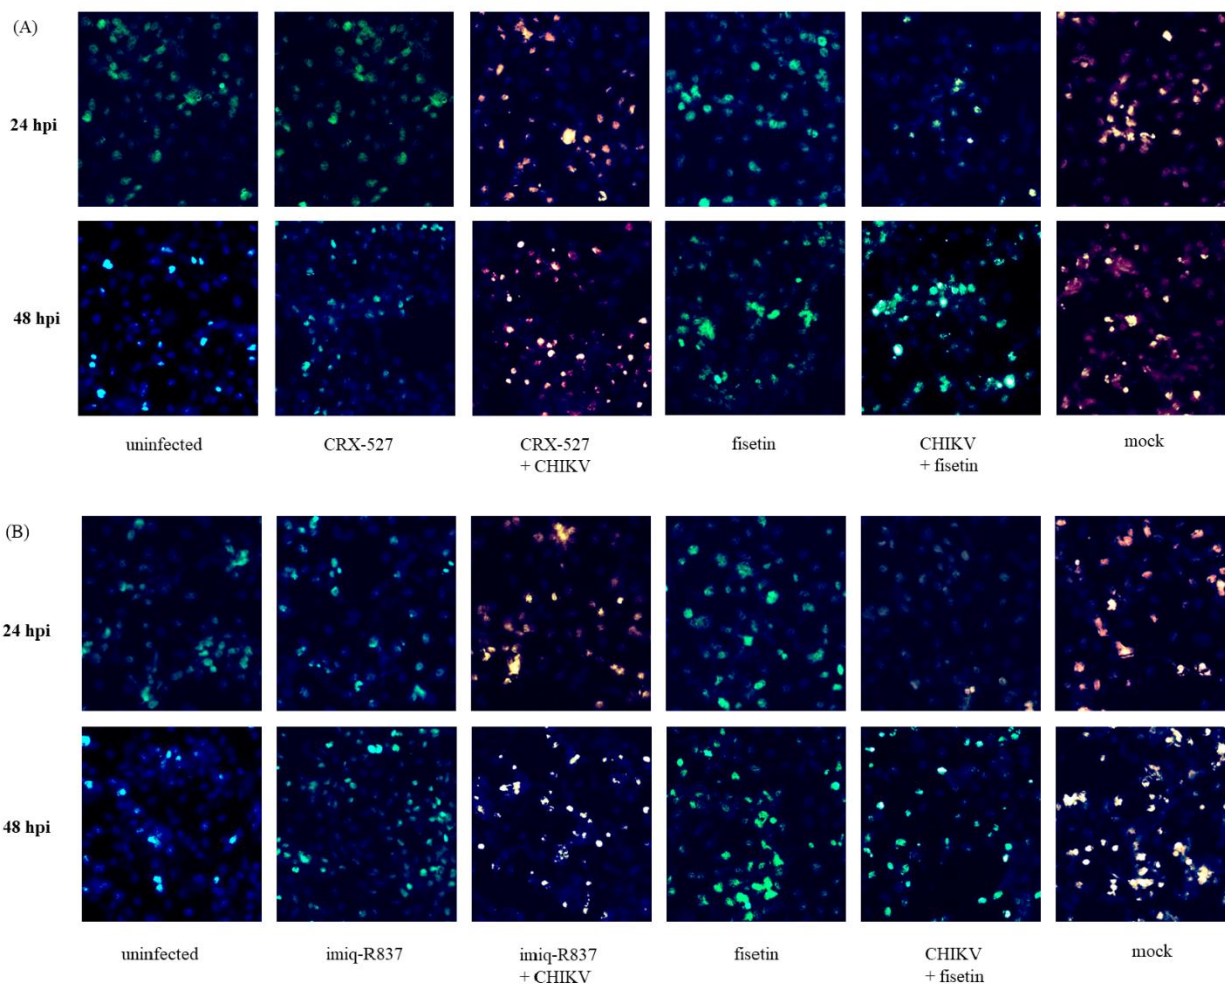

**Supplemental Figure S5: Endogenous TLR4 and TLR7 induction in Huh7 cells with respective treatments and CHIKV infection.** Immunofluorescence was performed using anti-TLR4 or anti-TLR7 (green), anti-E2 (red) and DAPI, at 24 hpi and 48 hpi.
